# Supplementary material
Source: publisher figshare collection journal article supplement (https://diabetesjournals.figshare.com/ndownloader/files/34343219)
Supplement: Supplementary file 1 [file 34343219]

## Sheet: Sheet1
Supplemental Table 1: Carbonylated proteins identified by LC-MS/MS in E13.5 offspring liver of HFD-fed dams. Total peptides (Total) and sum intensity (Unique) are shown in the samples of 35 kDa and 25 kDa gel pieces from the lysates of offspring liver.
35kDa samples
Unique	↓ Total	reference	Gene Symbol	Full name	MWT(kDa)
26	128	sp|O35685|NUDC_MOUSE	Nudc	Nuclear migration protein nudC	38.33
18	32	sp|P48036|ANXA5_MOUSE	Anxa5	Annexin A5	35.73
18	119	sp|P50580|PA2G4_MOUSE	Pa2g4	Proliferation-associated protein 2G4	43.67
14	17	sp|Q9WVJ2|PSD13_MOUSE	Psmd13	26S proteasome non-ATPase regulatory subunit 13	42.78
13	44	sp|P68040|RACK1_MOUSE	Rack1	Receptor of activated protein C kinase 1	35.05
13	14	sp|Q9D0F6|RFC5_MOUSE	Rfc5	Replication factor C subunit 5	38.07
13	16	sp|Q91WK2|EIF3H_MOUSE	Eif3h	Eukaryotic translation initiation factor 3 subunit H	39.81
12	28	sp|P70372|ELAV1_MOUSE	Elavl1	ELAV-like protein 1	36.15
12	26	sp|Q93092|TALDO_MOUSE	Taldo1	Transaldolase	37.36
12	13	sp|Q9JIF0|ANM1_MOUSE	Prmt1	Protein arginine N-methyltransferase 1	42.41
12	16	sp|Q9CXY6|ILF2_MOUSE	Ilf2	Interleukin enhancer-binding factor 2	43.04
11	36	sp|Q9QZD9|EIF3I_MOUSE	Eif3i	Eukaryotic translation initiation factor 3 subunit I	36.44
11	12	sp|O35864|CSN5_MOUSE	Cops5	COP9 signalosome complex subunit 5	37.52
11	16	sp|Q9WUP7|UCHL5_MOUSE	Uchl5	Ubiquitin carboxyl-terminal hydrolase isozyme L5	37.59
11	21	sp|Q64442|DHSO_MOUSE	Sord	Sorbitol dehydrogenase	38.22
11	26	sp|Q8VEM8|MPCP_MOUSE	Slc25a3	Phosphate carrier protein, mitochondrial	39.61
11	12	sp|Q9QXB9|DRG2_MOUSE	Drg2	Developmentally-regulated GTP-binding protein 2	40.69
11	13	sp|Q9DC69|NDUA9_MOUSE	Ndufa9	NADH dehydrogenase [ubiquinone] 1 alpha subcomplex subunit 9, mitochondrial	42.5
10	36	sp|P22907|HEM3_MOUSE	Hmbs	Porphobilinogen deaminase	39.32
10	10	sp|Q99K85|SERC_MOUSE	Psat1	Phosphoserine aminotransferase	40.45
10	76	sp|Q9R0N0|GALK1_MOUSE	Galk1	Galactokinase	42.27
10	88	sp|Q921F2|TADBP_MOUSE	Tardbp	TAR DNA-binding protein 43	44.52
9	12	sp|P97429|ANXA4_MOUSE	Anxa4	Annexin A4	35.89
9	13	sp|Q9CQ62|DECR_MOUSE	Decr1	2,4-dienoyl-CoA reductase, mitochondrial	36.19
9	12	sp|P62137|PP1A_MOUSE	Ppp1ca	Serine/threonine-protein phosphatase PP1-alpha catalytic subunit	37.52
9	12	sp|Q8BFZ9|ERLN2_MOUSE	Erlin2	Erlin-2	37.85
9	17	sp|P07356|ANXA2_MOUSE	Anxa2	Annexin A2	38.65
9	12	sp|P32233|DRG1_MOUSE	Drg1	Developmentally-regulated GTP-binding protein 1	40.49
9	13	sp|P55302|AMRP_MOUSE	Lrpap1	Alpha-2-macroglobulin receptor-associated protein	42.19
8	15	sp|Q9WVA3|BUB3_MOUSE	Bub3	Mitotic checkpoint protein BUB3	36.93
8	10	sp|Q9D051|ODPB_MOUSE	Pdhb	Pyruvate dehydrogenase E1 component subunit beta, mitochondrial	38.91
8	11	sp|Q62419|SH3G1_MOUSE	Sh3gl1	Endophilin-A2	41.49
7	15	sp|Q8BFQ4|WDR82_MOUSE	Wdr82	WD repeat-containing protein 82	35.06
7	14	sp|Q920G8|MFRN1_MOUSE	Slc25a37	Mitoferrin-1	37.49
7	11	sp|Q9D880|TIM50_MOUSE	Timm50	Mitochondrial import inner membrane translocase subunit TIM50	39.75
7	13	sp|P21278|GNA11_MOUSE	Gna11	Guanine nucleotide-binding protein subunit alpha-11	42
6	11	sp|P28352|APEX1_MOUSE	Apex1	DNA-(apurinic or apyrimidinic site) lyase	35.47
5	30	sp|P62874|GBB1_MOUSE	Gnb1	Guanine nucleotide-binding protein G(I)/G(S)/G(T) subunit beta-1	37.35
5	10	sp|Q9CQT1|MTNA_MOUSE	Mri1	Methylthioribose-1-phosphate isomerase	39.39
5	11	sp|Q6NTA4|RRAGB_MOUSE	Rragb	Ras-related GTP-binding protein B	43.16
4	24	sp|Q9QYA2|TOM40_MOUSE	Tomm40	Mitochondrial import receptor subunit TOM40 homolog	37.87
3	10	sp|P62141|PP1B_MOUSE	Ppp1cb	Serine/threonine-protein phosphatase PP1-beta catalytic subunit	37.16
3	50	sp|Q9JKV1|ADRM1_MOUSE	Adrm1	Proteasomal ubiquitin receptor ADRM1	42.03
2	12	sp|P00342|LDHC_MOUSE	Ldhc	L-lactate dehydrogenase C chain	35.89
25kDa samples
Unique	↓ Total	reference	Gene Symbol	Full name	MWT(kDa)
21	150	sp|P62259|1433E_MOUSE	Ywhae	14-3-3 protein epsilon	29.16
18	110	sp|Q9R1P4|PSA1_MOUSE	Psma1	Proteasome subunit alpha type-1	29.53
14	31	sp|Q62446|FKBP3_MOUSE	Fkbp3	Peptidyl-prolyl cis-trans isomerase FKBP3	25.13
14	40	sp|P67778|PHB_MOUSE	Phb	Prohibitin	29.8
13	68	sp|Q6PDM2|SRSF1_MOUSE	Srsf1	Serine/arginine-rich splicing factor 1	27.73
13	56	sp|P68510|1433F_MOUSE	Ywhah	14-3-3 protein eta	28.19
13	20	sp|P57784|RU2A_MOUSE	Snrpa1	U2 small nuclear ribonucleoprotein A'	28.34
12	23	sp|Q9DCW4|ETFB_MOUSE	Etfb	Electron transfer flavoprotein subunit beta	27.61
12	143	sp|Q9CQV8|1433B_MOUSE	Ywhab	14-3-3 protein beta/alpha	28.07
12	13	sp|P97371|PSME1_MOUSE	Psme1	Proteasome activator complex subunit 1	28.65
11	38	sp|Q9CXW3|CYBP_MOUSE	Cacybp	Calcyclin-binding protein	26.49
11	86	sp|P63101|1433Z_MOUSE	Ywhaz	14-3-3 protein zeta/delta	27.75
11	81	sp|P61982|1433G_MOUSE	Ywhag	14-3-3 protein gamma	28.28
11	13	sp|Q61166|MARE1_MOUSE	Mapre1	Microtubule-associated protein RP/EB family member 1	30
10	16	sp|P97372|PSME2_MOUSE	Psme2	Proteasome activator complex subunit 2	27.04
10	11	sp|Q9Z2U0|PSA7_MOUSE	Psma7	Proteasome subunit alpha type-7	27.84
10	52	sp|P62918|RL8_MOUSE	Rpl8	60S ribosomal protein L8	28.01
10	14	sp|Q66JS6|EI3JB_MOUSE	Eif3j2	Eukaryotic translation initiation factor 3 subunit J-B	29.47
10	10	sp|P61290|PSME3_MOUSE	Psme3	Proteasome activator complex subunit 3	29.49
9	111	sp|O70456|1433S_MOUSE	Sfn	14-3-3 protein sigma	27.69
9	33	sp|O70435|PSA3_MOUSE	Psma3	Proteasome subunit alpha type-3	28.39
9	38	sp|Q9DBJ1|PGAM1_MOUSE	Pgam1	Phosphoglycerate mutase 1	28.81
9	61	sp|P00920|CAH2_MOUSE	Ca2	Carbonic anhydrase 2	29.01
9	14	sp|Q78IK4|MIC27_MOUSE	Apool	MICOS complex subunit Mic27	29.24
8	19	sp|Q9Z1Q5|CLIC1_MOUSE	Clic1	Chloride intracellular channel protein 1	27
8	68	sp|O35381|AN32A_MOUSE	Anp32a	Acidic leucine-rich nuclear phosphoprotein 32 family member A	28.52
8	17	sp|Q9R1P0|PSA4_MOUSE	Psma4	Proteasome subunit alpha type-4	29.45
8	12	sp|Q99LD8|DDAH2_MOUSE	Ddah2	N(G),N(G)-dimethylarginine dimethylaminohydrolase 2	29.63
7	22	sp|O09131|GSTO1_MOUSE	Gsto1	Glutathione S-transferase omega-1	27.48
7	30	sp|P68254|1433T_MOUSE	Ywhaq	14-3-3 protein theta	27.76
6	28	sp|Q9WV55|VAPA_MOUSE	Vapa	Vesicle-associated membrane protein-associated protein A	27.84
6	10	tr|Q8C7C3|Q8C7C3_MOUSE	Tpm3	Tropomyosin alpha-3 chain	28.88
5	19	sp|O70251|EF1B_MOUSE	Eef1b	Elongation factor 1-beta	24.68
5	18	sp|P50518|VATE1_MOUSE	Atp6v1e1	V-type proton ATPase subunit E 1	26.14
5	33	sp|Q9QYB1|CLIC4_MOUSE	Clic4	Chloride intracellular channel protein 4	28.71
5	48	sp|O70250|PGAM2_MOUSE	Pgam2	Phosphoglycerate mutase 2	28.81
4	19	sp|Q9CY57|CHTOP_MOUSE	Chtop	Chromatin target of PRMT1 protein	26.57
4	33	sp|P97822|AN32E_MOUSE	Anp32e	Acidic leucine-rich nuclear phosphoprotein 32 family member E	29.6
